# Supplementary material
Source: publisher figshare collection journal article supplement (https://sage.figshare.com/ndownloader/files/17771228)
Supplement: Supplementary file 1 [file 17771228]

## Diabetes Education Video Semi-Structured Interview Guide

1. What did you learn from the video?
2. How would you describe the video to someone else?
3. Were there some parts that were confusing?
  - (a) What parts were confusing?
  - (b) What would make the use of the glucometer easier to understand?
  - (c) What suggestions do you have to improve the content?
4. What parts of the video were most helpful or easy to understand?
  - (a) Can you tell me more about that?
5. What parts of the video were least helpful or difficult to understand?
  - (a) Can you tell me more about that?
6. What did you learn that was most helpful?
7. How did you (or will you) put it into practice?
8. Were there other things that were helpful or that you put into practice?
9. What were some of the challenges with putting what you learned into practice?
10. What topics would you want more information about?
11. What other ways do you need help to manage your diabetes?
12. Did you find the video to be culturally appropriate and effective?
  - (a) What parts were culturally appropriate and effective?
  - (b) What parts were NOT culturally appropriate and effective?
13. Did you think the length of the video was right- was it too short or too long?
  - (a) Why?
  - (b) Why not?
14. How could we improve the video?
15. Overall, was using a video to learn more about using your glucometer a positive experience? (a) Would you recommend it to others?
16. Is there any additional information regarding the video that you would like to share?
